# Supplementary material for: Global Pharmacovigilance Study of Bone Fractures with Androgen Receptor Pathway Inhibitors in Prostate Cancer
Source: Research Square preprint supplement (doi:10.21203/rs.3.rs-8658712/v1), 2026-01-30
Supplement: Supplementary file 1 [file d74ea41444b6daed4a6a0e66.docx]

**SUPPLEMENTARY FILES**

**Supplementary File 1. MedDRA terms of included skeletal related events.**

| **MedDRA Code** | **MedDRA LLT** |
| --- | --- |
| 10002544 | Ankle fracture |
| 10009245 | Clavicle fracture |
| 10010214 | Compression fracture |
| 10010216 | Compression of fractured vertebra |
| 10014344 | Elbow fracture |
| 10016042 | Facial bones fracture |
| 10016450 | Femoral neck fracture |
| 10016454 | Femur fracture |
| 10016667 | Fibula fracture |
| 10016970 | Foot fracture |
| 10017076 | Fracture |
| 10017077 | Fracture bone |
| 10017082 | Fracture due to osteoporosis |
| 10017083 | Fracture femur |
| 10017127 | Fracture of humerus |
| 10017163 | Fracture of neck of femur |
| 10017183 | Fracture of pelvis |
| 10017287 | Fractured hip |
| 10017298 | Fractured metatarsal |
| 10017299 | Fractured neck of femur |
| 10017307 | Fractured ribs |
| 10017314 | Fractured toe |
| 10020462 | Humerus fracture |
| 10024128 | Leg fracture |
| 10028200 | Multiple fractures |
| 10030682 | Open reduction of fracture |
| 10030683 | Open reduction of fracture with internal fixation |
| 10031283 | Osteoporosis fracture |
| 10031288 | Osteoporosis with fracture |
| 10031290 | Osteoporotic fracture |
| 10034122 | Patella fracture |
| 10034156 | Pathological fracture |
| 10037802 | Radius fracture |
| 10039117 | Rib fracture |
| 10041541 | Spinal compression fracture |
| 10041569 | Spinal fracture |
| 10042212 | Stress fracture |
| 10043827 | Tibia fracture |
| 10047333 | Vertebral fracture |
| 10048049 | Wrist fracture |
| 10049127 | Arm fracture |
| 10049128 | Shoulder fracture |
| 10049514 | Traumatic fracture |
| 10049946 | Cervical vertebral fracture |
| 10049947 | Lumbar vertebral fracture |
| 10049948 | Thoracic vertebral fracture |
| 10053651 | Knee fracture |
| 10053653 | Femur fracture subtrochanteric |
| 10061161 | Pelvic fracture |
| 10061365 | Skull fracture |
| 10061394 | Upper limb fracture |
| 10061599 | Lower limb fracture |
| 10062544 | Tooth fracture |
| 10066184 | Avulsion fracture |
| 10069887 | Femur shaft fracture |
| 10070884 | Atypical femur fracture |
| 10072132 | Fracture pain |

**Supplementary File 2. Androgen deprivation therapy included in sensitivity analysis**

leuprolide, goserelin, triptorelin, buserelin, degarelix, relugolix, flutamide, nilutamide, and bicalutamide
